# Supplementary material for: Phagocytic Activities of Reactive Microglia and Astrocytes Associated with Prion Diseases Are Dysregulated in Opposite Directions
Source: MDPI journal article supplement (doi:10.3390/cells10071728), 2021-07-08
Supplement: s1 [file s1]

**Figure S1**

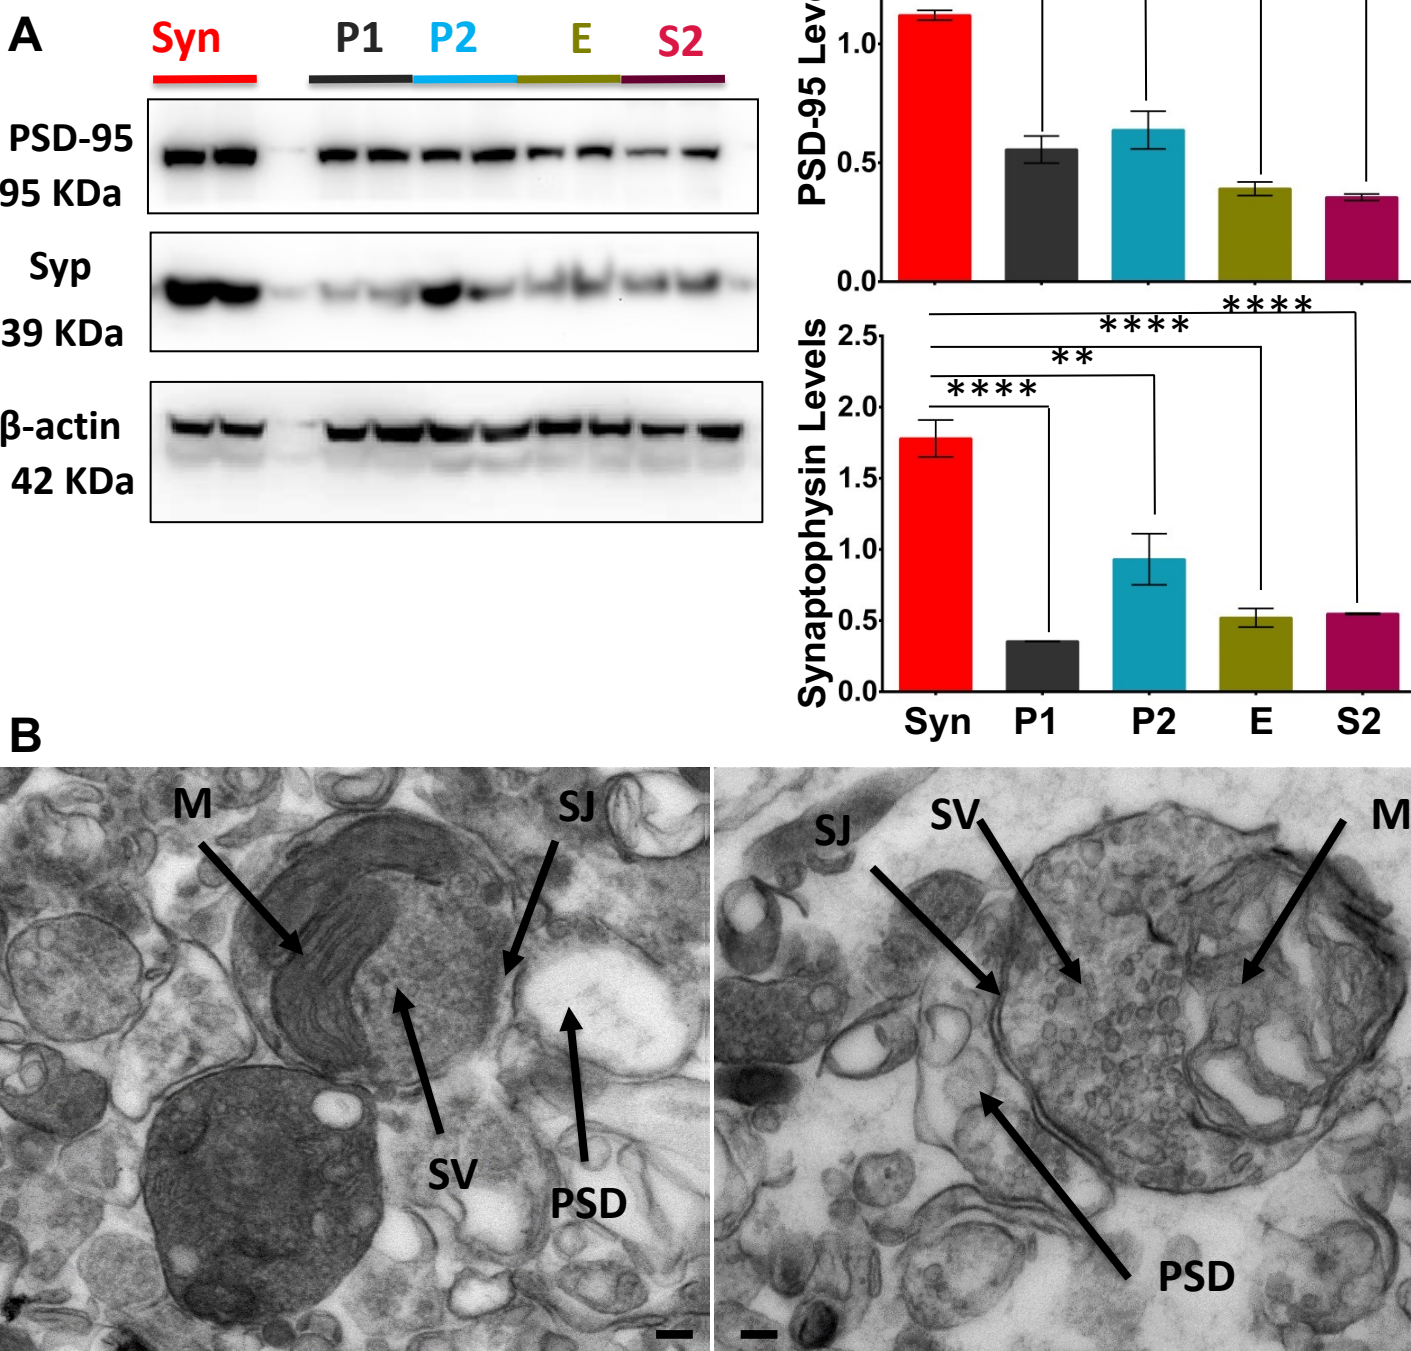

Figure S1. Isolation and characterization of synaptosomes. **A**. Representative Western blots of fractions (P1 - pellet 1, P2 - pellet 2, E - Extrasynaptic fraction and S2 - cytosolic fraction) collected during isolation of synaptosome and the final synaptosome-enriched fraction (Syn) (left), and densitometric analysis of PSD-95 and synaptophysin (Syp) normalized per amounts of  $\beta$ -actin in different fractions.  $n=3$  independent isolations from individual animals, each analyzed in triplicate. Data are expressed as mean  $\pm$  SEM,  $n=3$  independent synaptosomes preparations isolated from individual control animals, \*\* $p < 0.01$ , \*\*\* $p < 0.001$ , \*\*\*\* $p < 0.0001$  by one-way ANOVA followed by Tukey's test. **B**. Imaging of synaptosome preparations isolated from control animals by TEM. PSD, postsynaptic density; SJ, synaptic junction; SV, synaptic vesicles and M, mitochondria. Scale bar = 0.1  $\mu$ m.

**Figure S2**

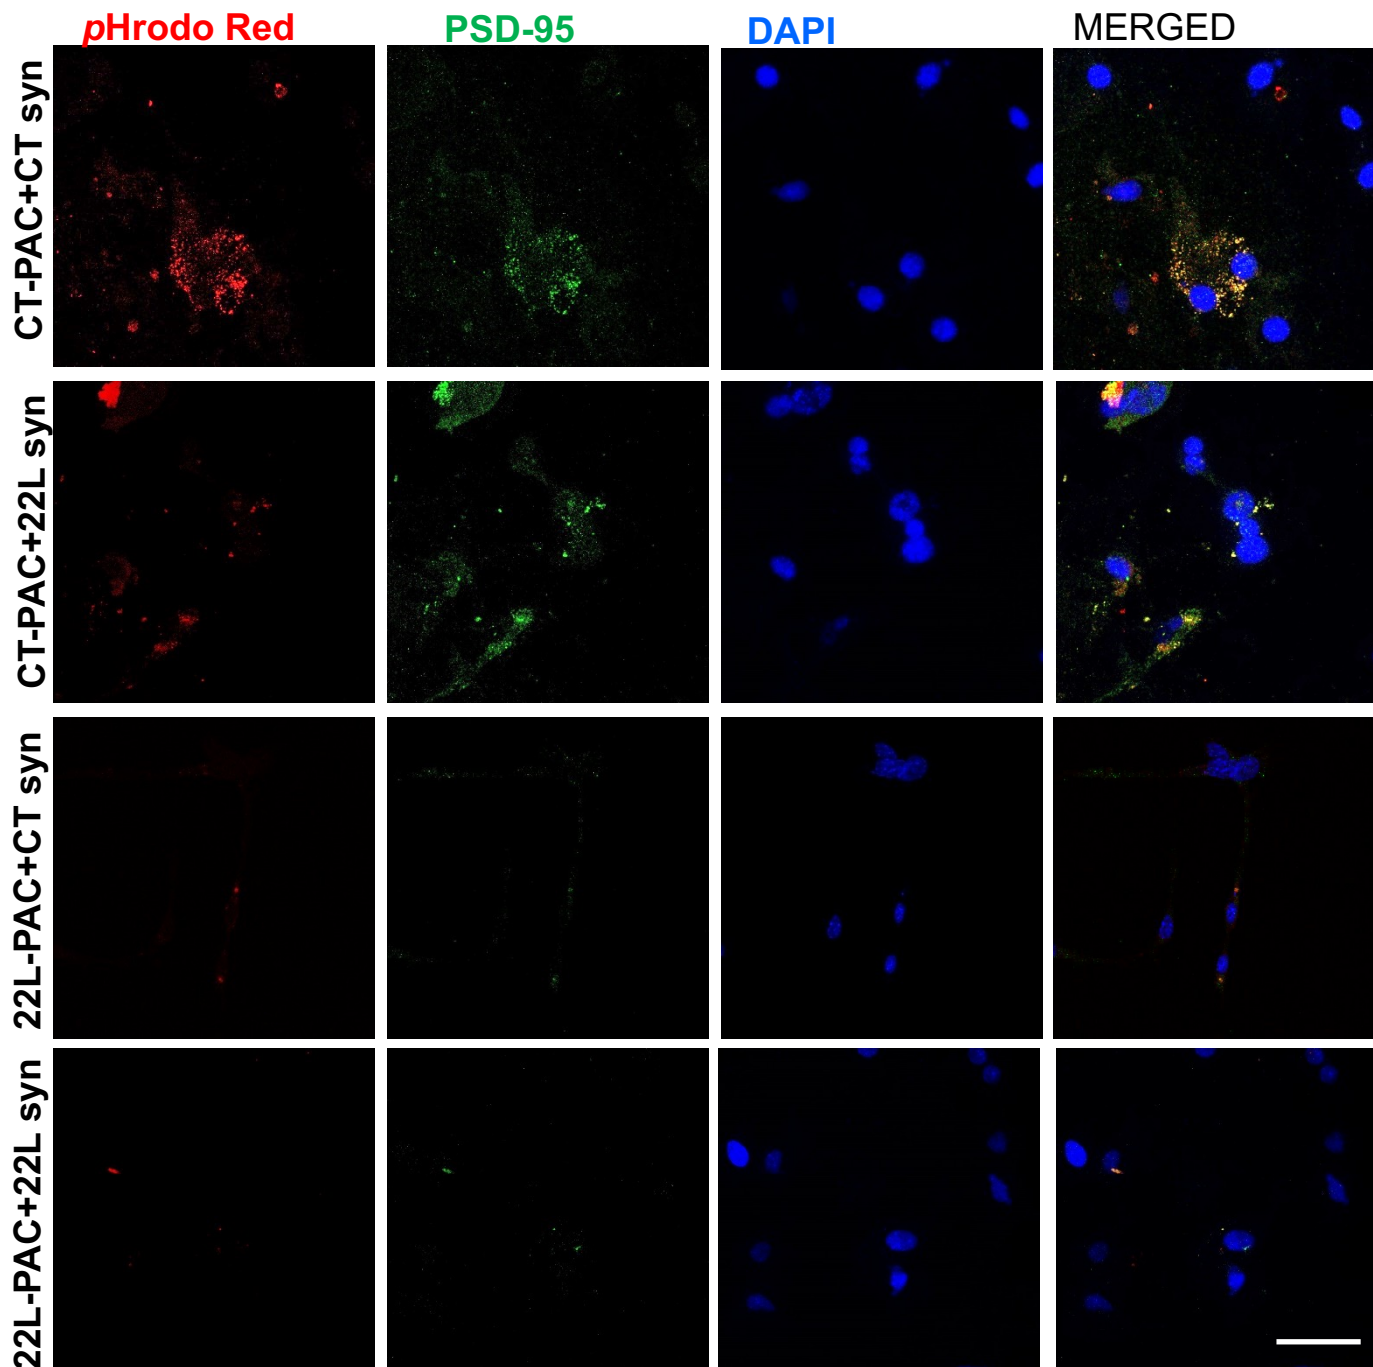

Figure S2: Confocal microscopy imaging of CT-PAC and 22L-PAC incubated with pHrodo Red-conjugated CT-syn or 22L-syn for 24 hours and stained for PSD-95 (green). Cell nuclei are stained with DAPI (blue). Scale bar = 25  $\mu$ m.
